# Supplementary material for: Conserved properties of Drosophila Insomniac link sleep regulation and synaptic function
Source: PubMed Central journal article supplement (PMC5469494; doi:10.1371/journal.pgen.1006815), 2017-05-30
Supplement: pgen.1006815.s007.pdf [file pgen.1006815.s007.pdf]

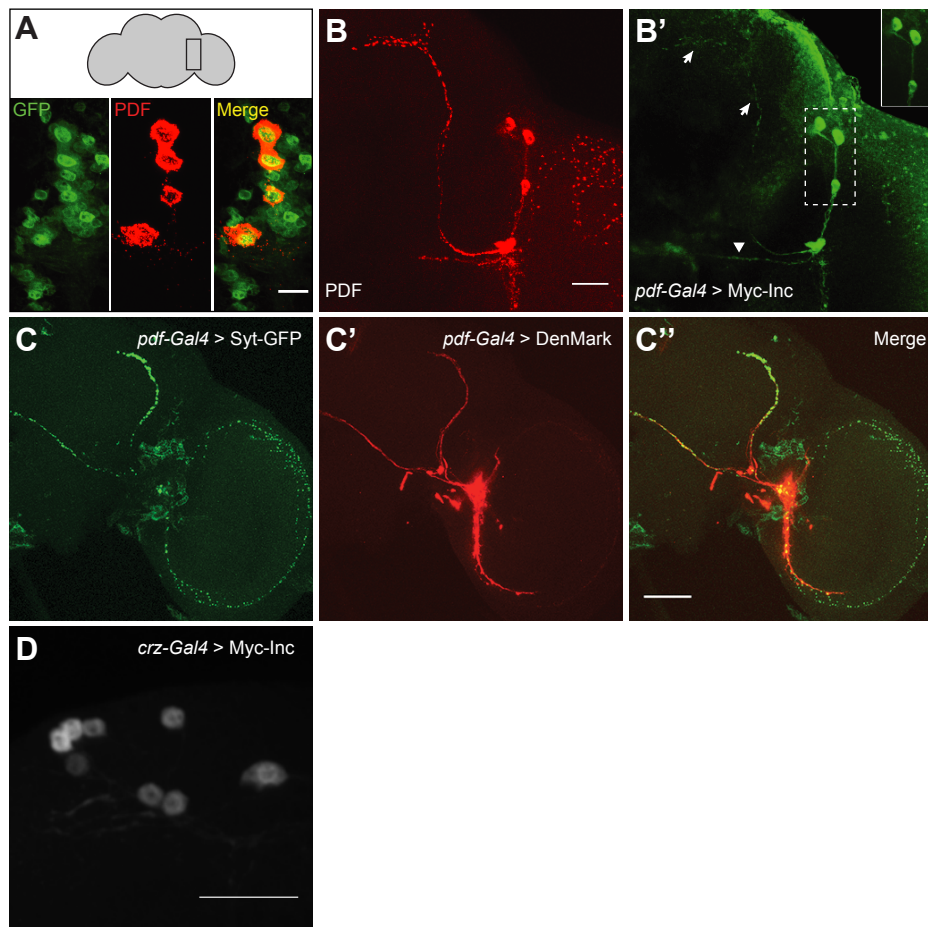

Figure S7
